# Supplementary material
Source: PubMed Central journal article supplement (PMC5547018)
Supplement: NIHMS848645-supplement-FINAL_PRODUCTION_FILE__SDC_1.pdf [file NIHMS848645-supplement-FINAL_PRODUCTION_FILE__SDC_1.pdf]

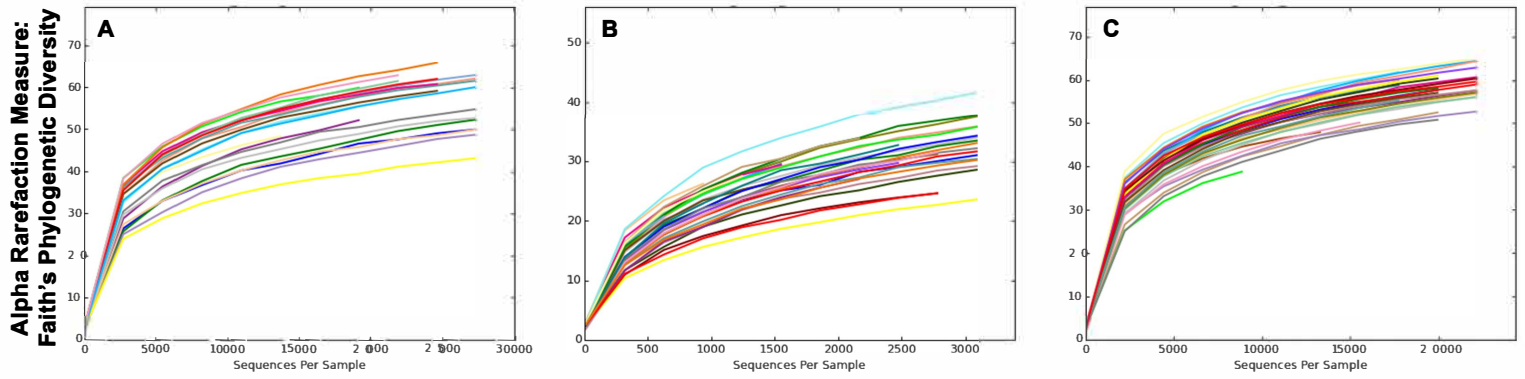

**Figure S1.** Alpha rarefaction curves for all three datasets, longitudinal (Illumina MiSeq; A), 454-Pyrosequencing (B) and Illumina MiSeq (C), comparing relative sampling rates across all samples utilized in the analyses.

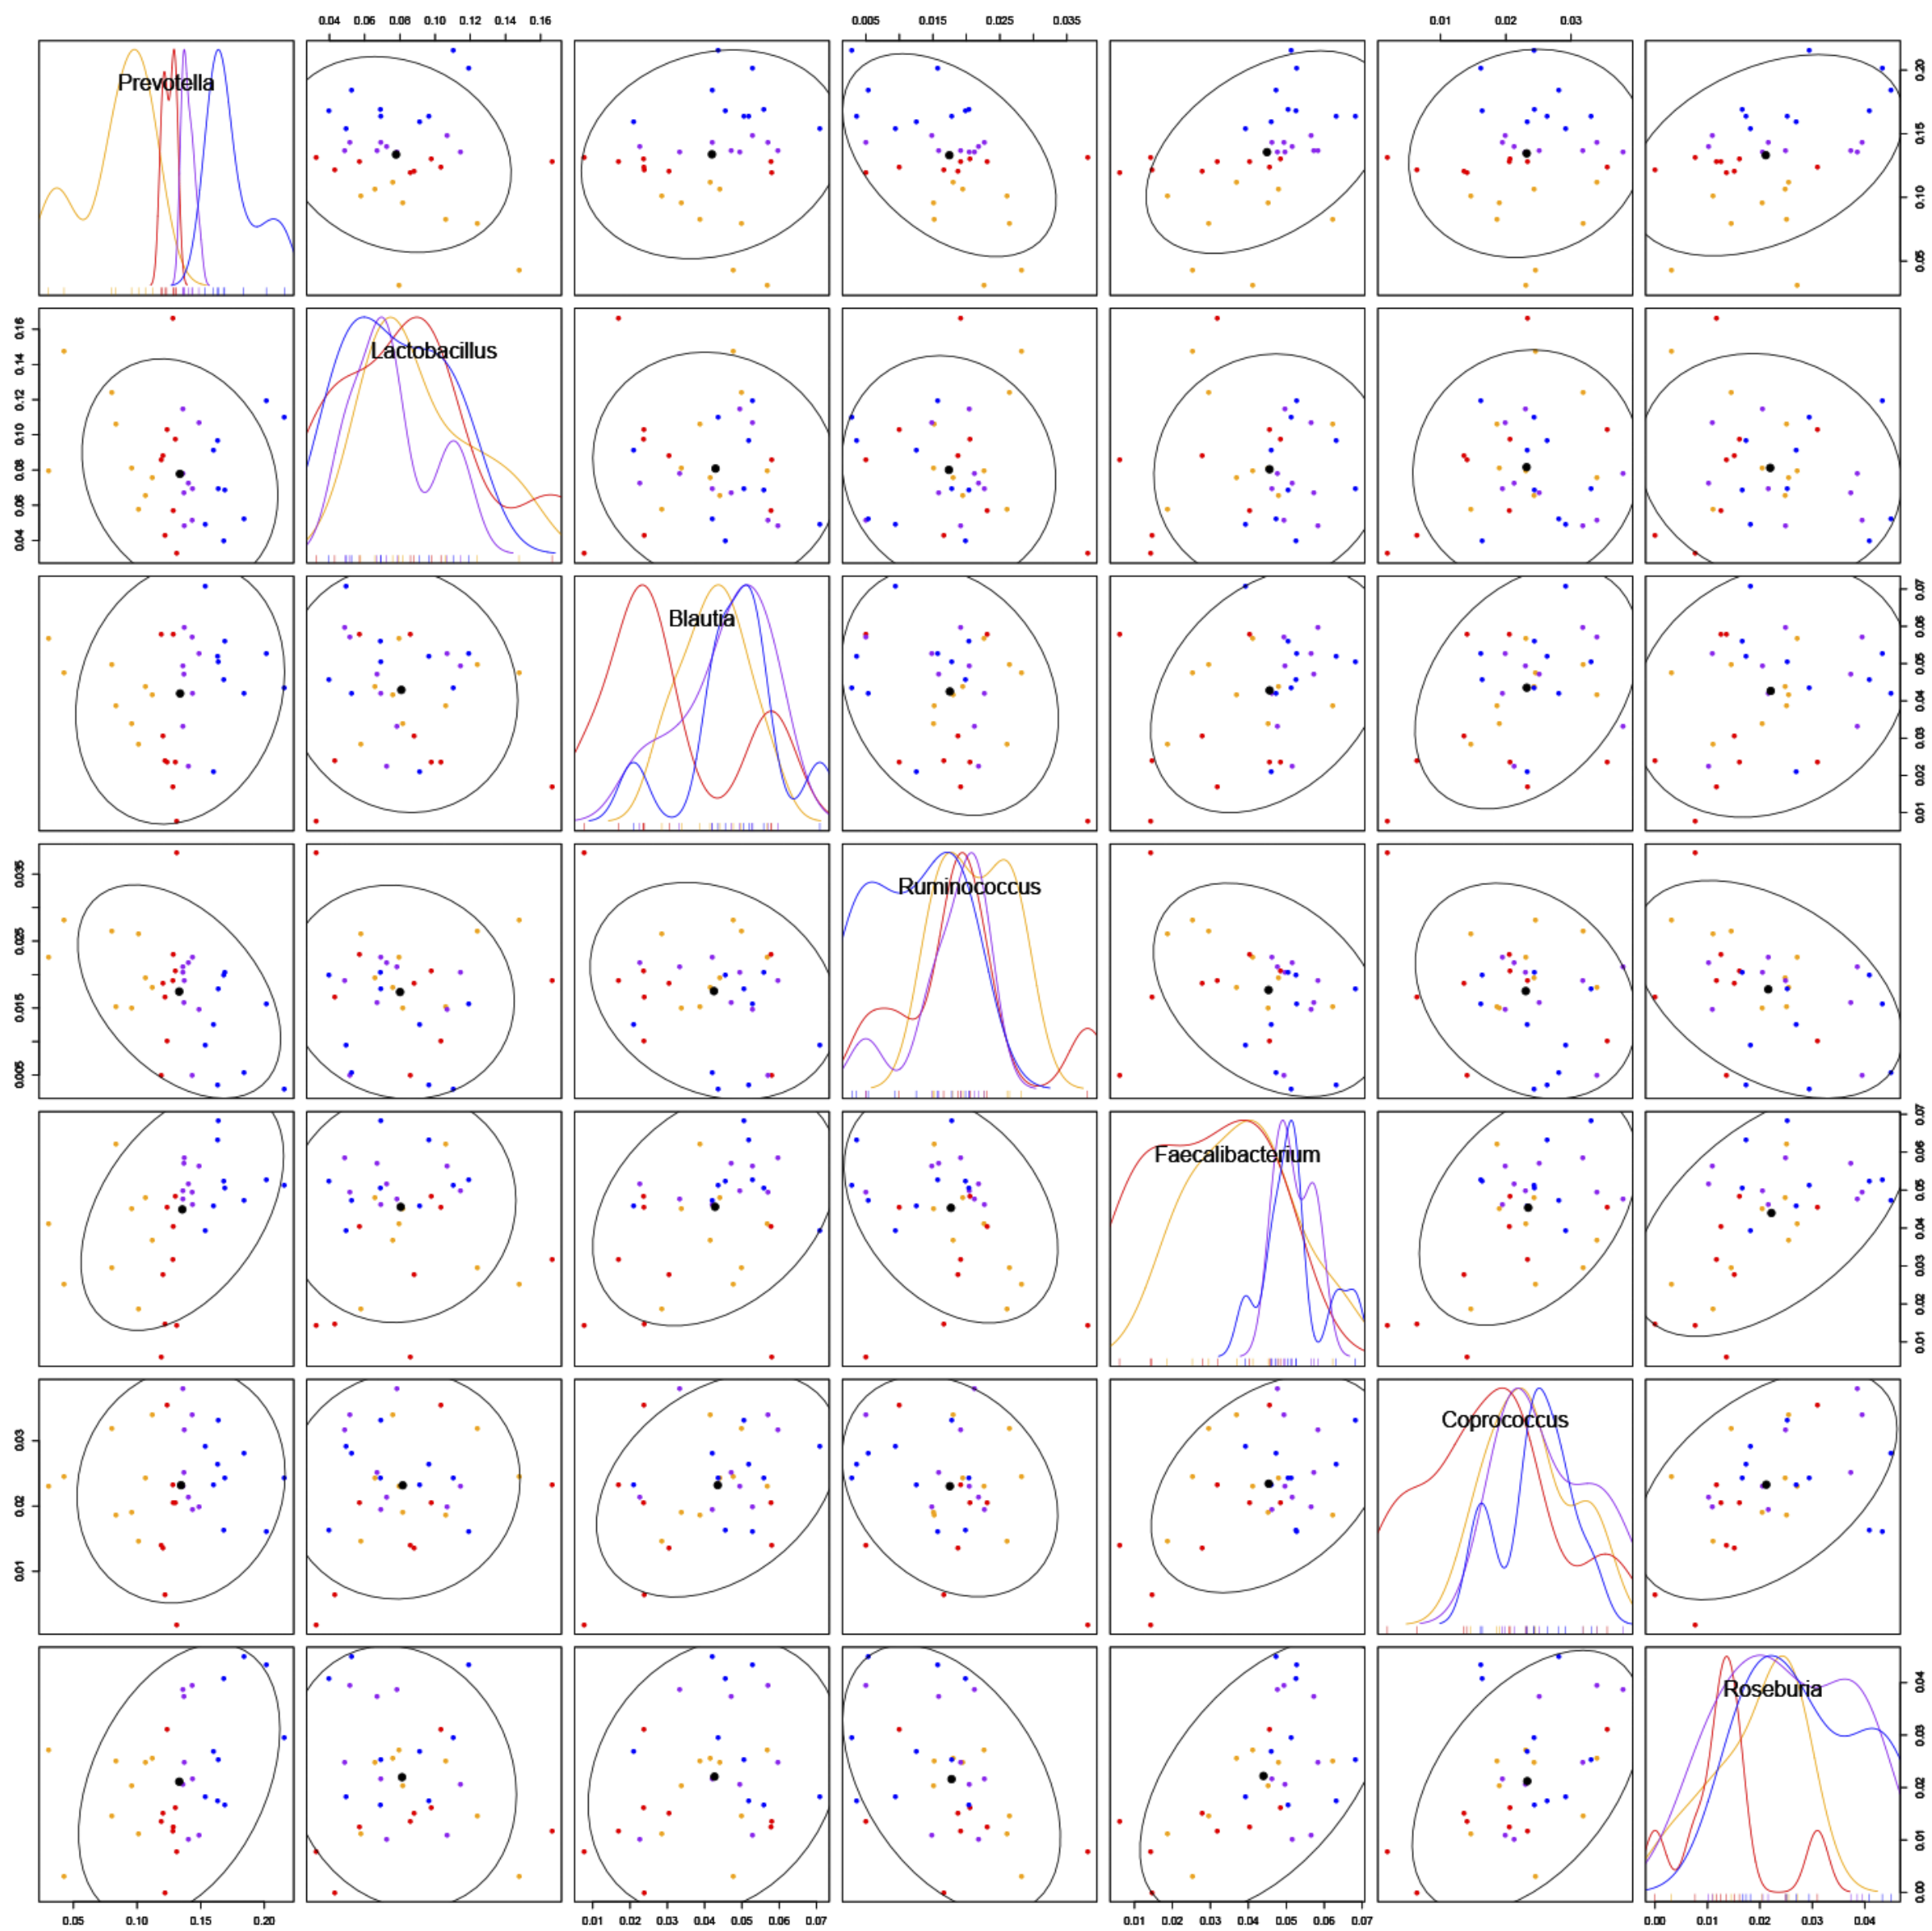

**Figure S2.** Pearson's correlations among abundant (>1%) genera in the 454-pyrosequencing data. Diagonals indicate the frequency distribution of each genus. Orange, red, purple and blue colors indicate samples categorized by quartiles of *Prevotella* abundance.

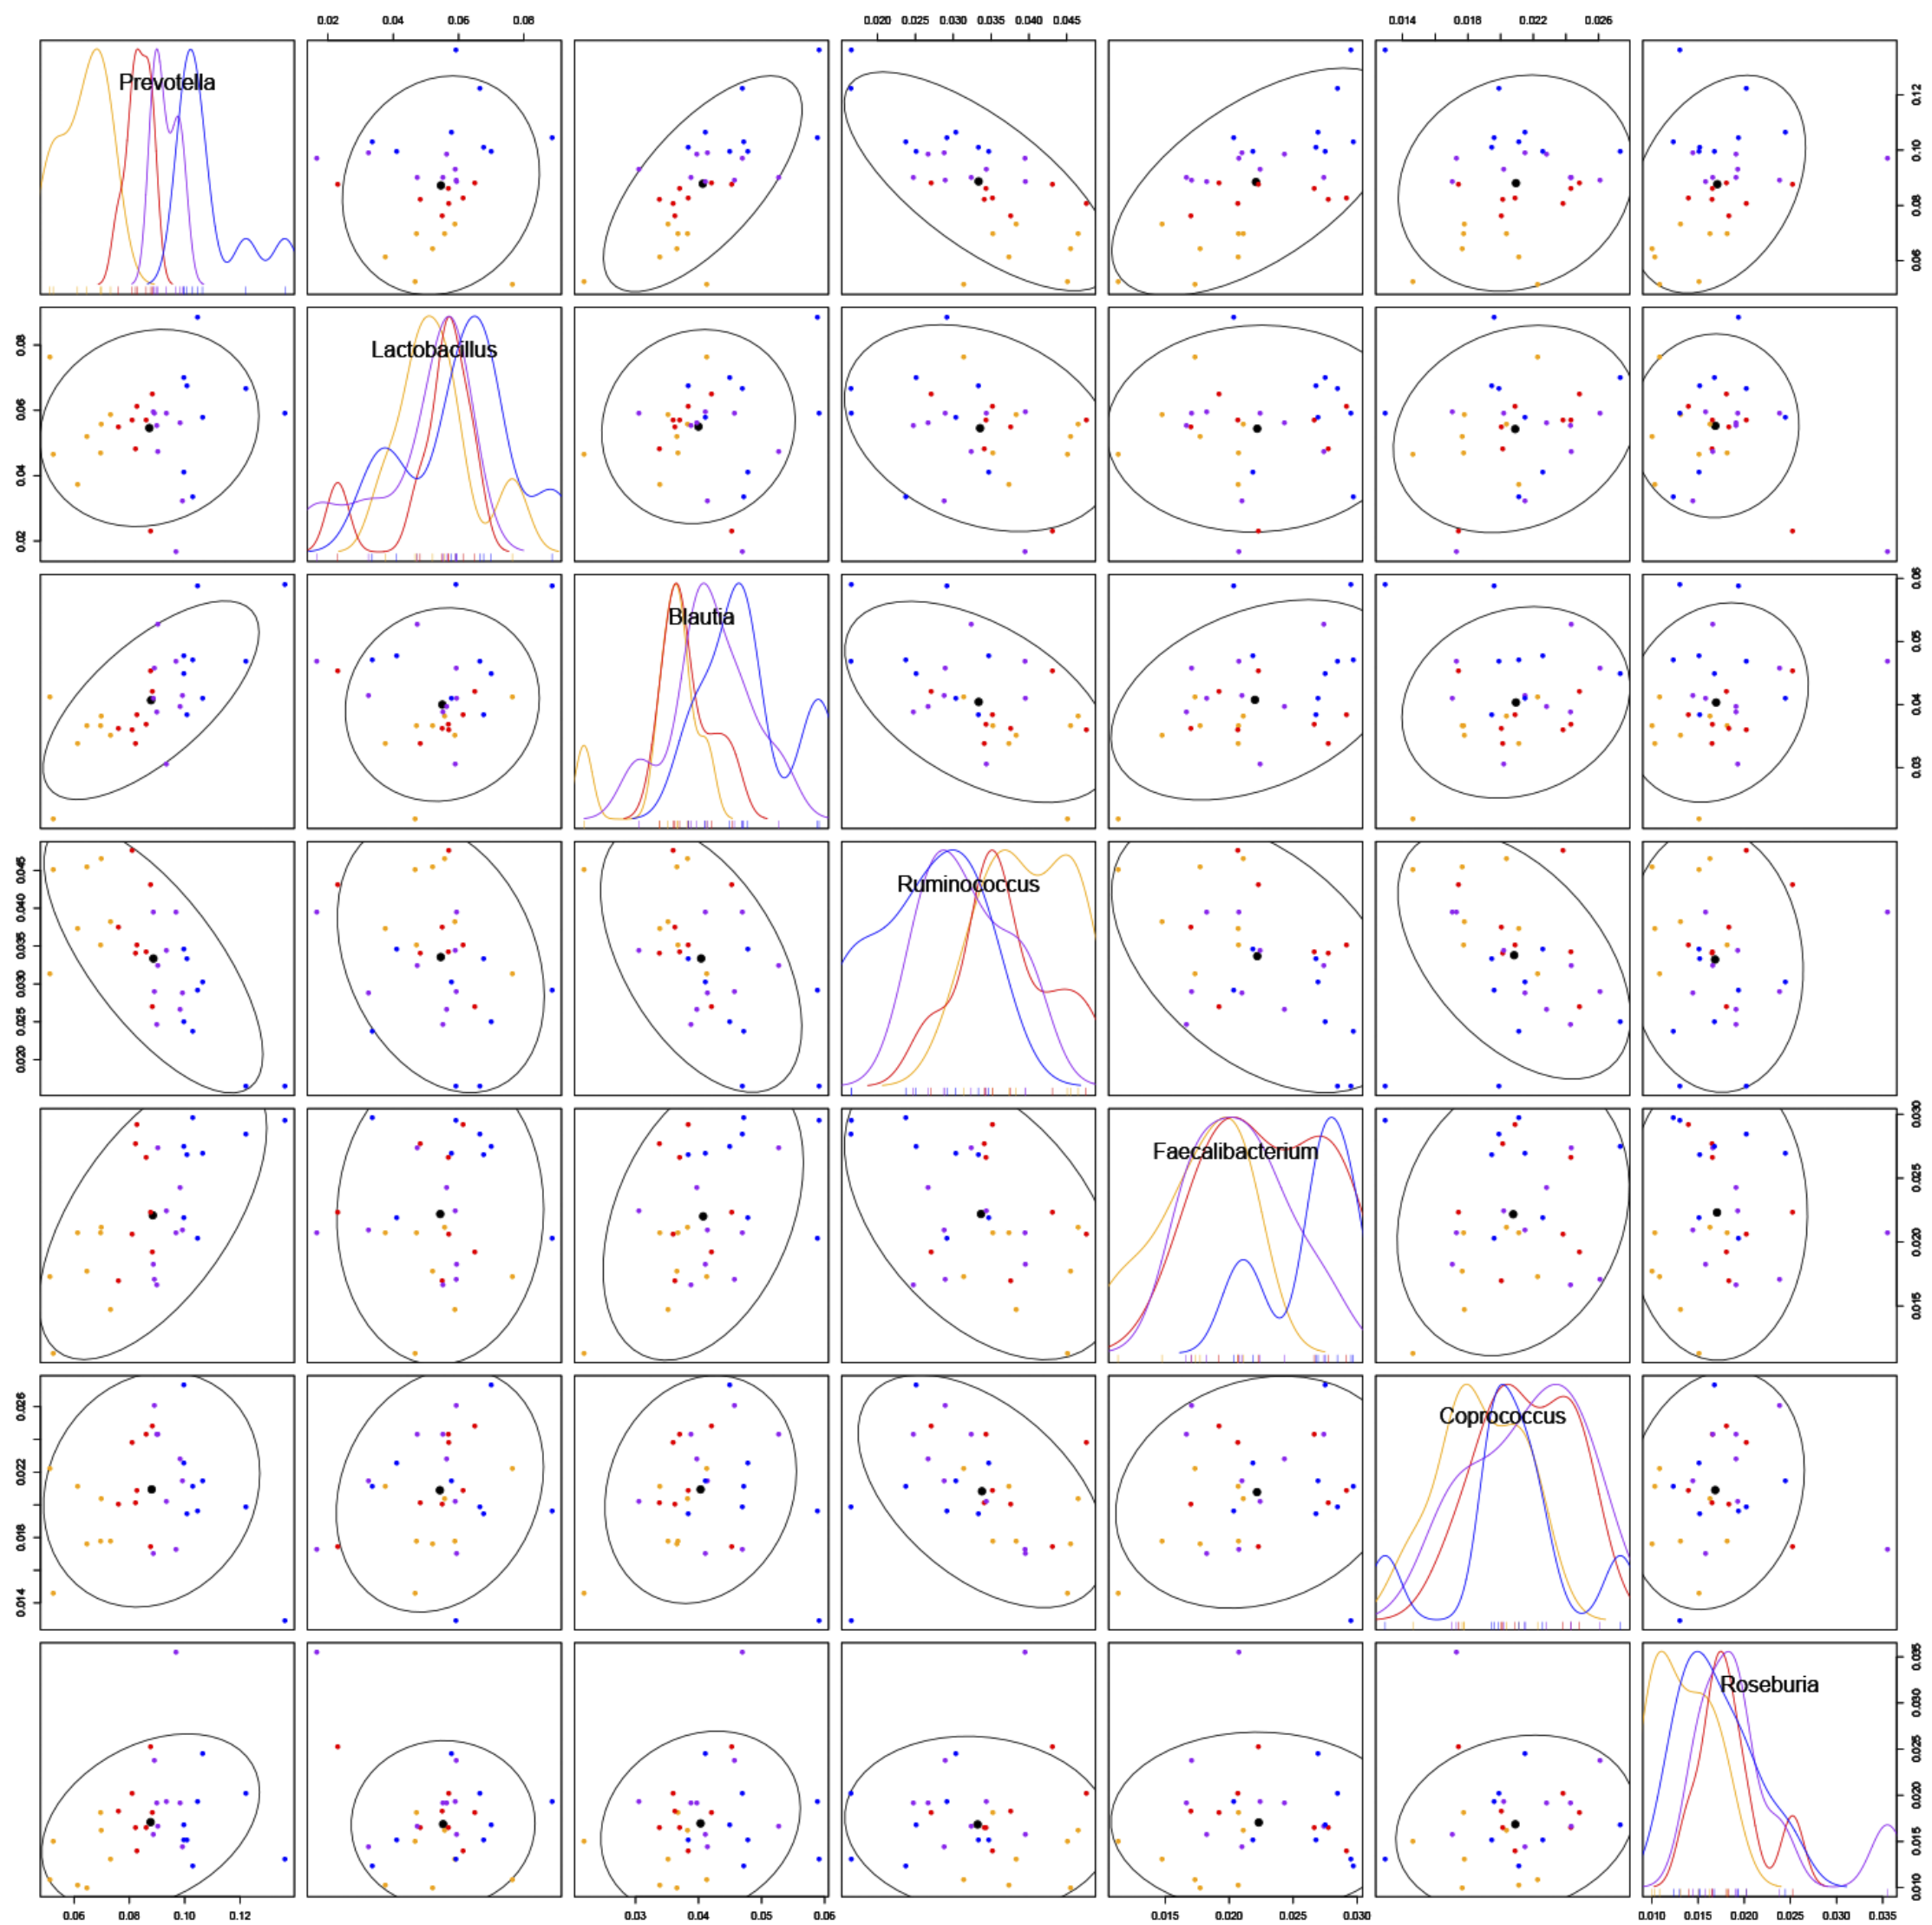

**Figure S3.** Pearson's correlations among abundant (>1%) genera in the Illumina MiSeq data. Diagonals indicate the frequency distribution of each genus. Orange, red, purple and blue colors indicate samples categorized by quartiles of *Prevotella* abundance.

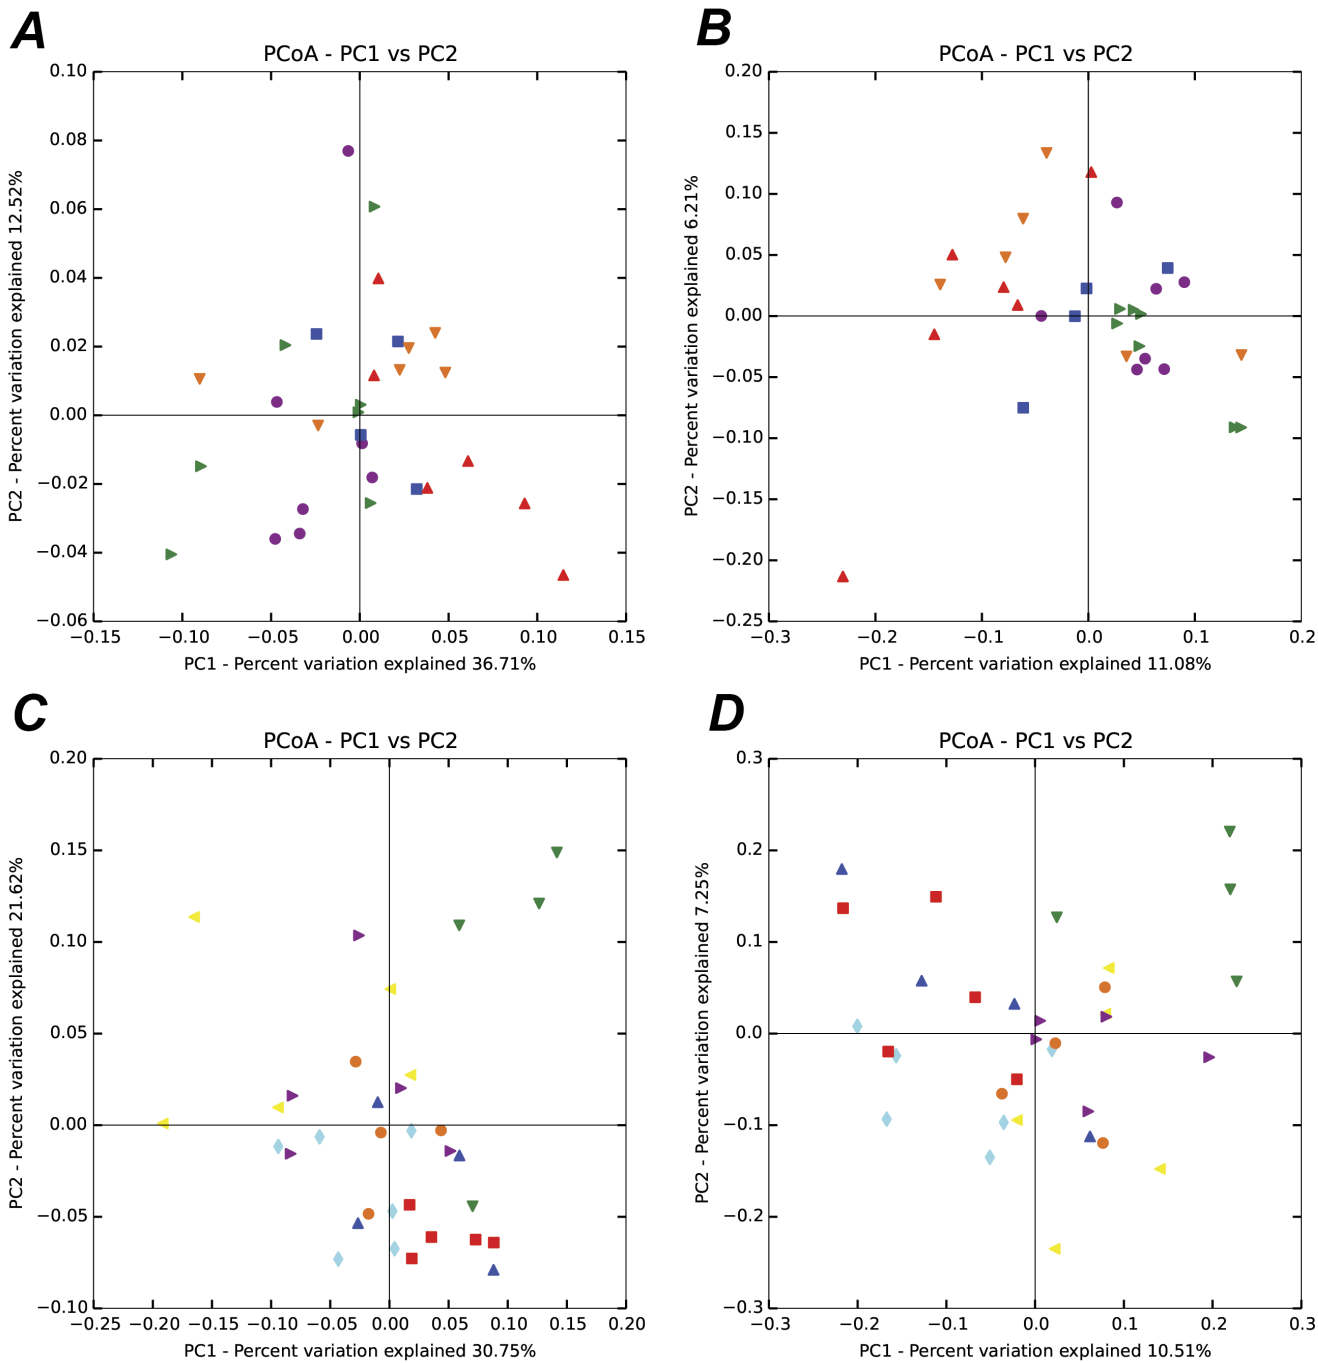

**Figure S4.** PCoA of beta diversity showing the microbial clustering among members in a social group. Microbial profiles of monkeys within a group were more similar in spite of individual differences in *Prevotella* abundance and associated taxa and overlap between some groups. Analyses of dissimilarity indicated significant differences in microbiota profiles across the 7 groups sequenced by Illumina MiSeq, using both weighted and unweighted UNIFRAC (A and B), and across the 5 groups sequenced with 454-pyrosequencing (C and D). See Results section for more details.
